# Supplementary material for: Role of Nanoparticle–Polymer Interactions on the Development of Double-Network Hydrogel Nanocomposites with High Mechanical Strength
Source: MDPI journal article supplement (doi:10.3390/polym12020470), 2020-02-18
Supplement: s1 [file s1]

# Role of Nanoparticle–Polymer Interactions on the Development of Double-Network Hydrogel Nanocomposites with High Mechanical Strength

Andrew Chang, Nasim Babhadiashar, Emma Barrett-Catton and Prashanth Asuri \*

Department of Bioengineering, Santa Clara University, Santa Clara, CA 95053, USA; ahchang@scu.edu (A.C.); nbabhadiashar@scu.edu (N.B.); ebarrettcotton@scu.edu (E.B.-C.)

\* Correspondence: asurip@scu.edu; Tel.: +1408-551-3005

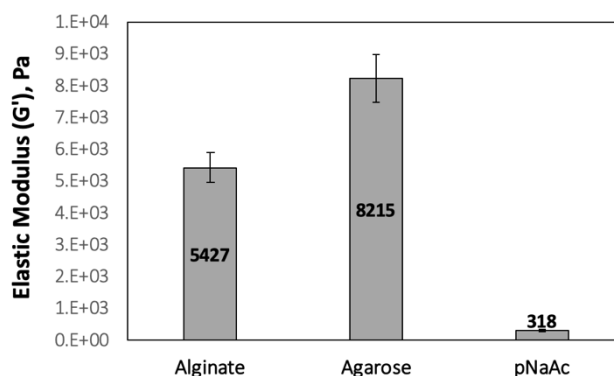

**Figure S1.** Elastic moduli of neat alginate, agarose, and pNaAc hydrogels prepared using 2% monomer. Data shown are the mean of triplicate measurements  $\pm$  standard deviation and have been repeated at least three times with similar results.

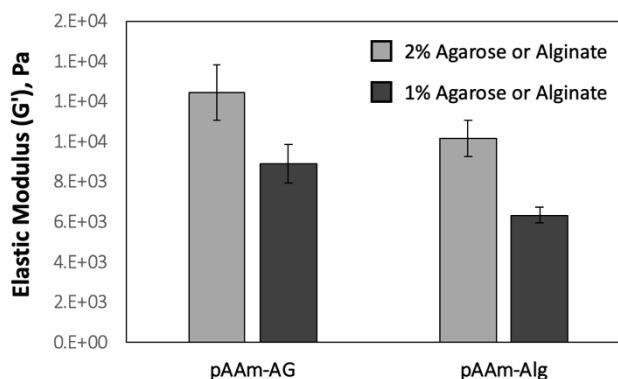

**Figure S2.** Elastic moduli of pAAM-agarose (pAAM-AG) and pAAM-alginate (pAAM-Alg) hydrogels, prepared using 5% pAAM and 2% (light grey bars) or 1% (dark grey bars) second polymer (agarose or alginate). Data shown are the mean of triplicate measurements plus standard deviation and have been repeated at least three times with similar results.

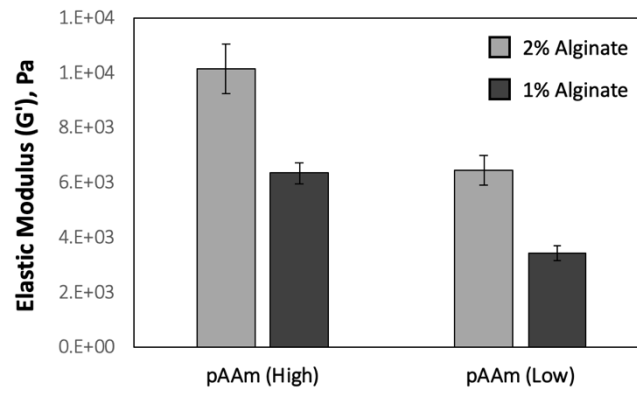

**Figure S3.** Elastic moduli of pAAM-alginate hydrogels, prepared using 5% (High) or 2.5% (Low) pAAM and 2% (light grey bars) or 1% (dark grey bars) alginate. Data shown are the mean of triplicate measurements plus standard deviation and have been repeated at least three times with similar results.
